# Supplementary material for: Removal of dioxane pollutants from water by using Al-doped single walled carbon nanotubes
Source: Royal Society of Chemistry journal article supplement (doi:10.1039/c5ra07611k), 2015-01-01

**Figure 5:** Comparison between the density of states (DOS) for an isolated dioxane molecule, an isolated CNT (10, 0), and the combination of the two at equilibrium geometry for energetically favorable (c) dioxane/CNT (10, 0) with defect systems and, (d) H<sub>2</sub>O/CNT (10, 0), and (e) H<sub>2</sub>O/Al-CNT (10, 0).

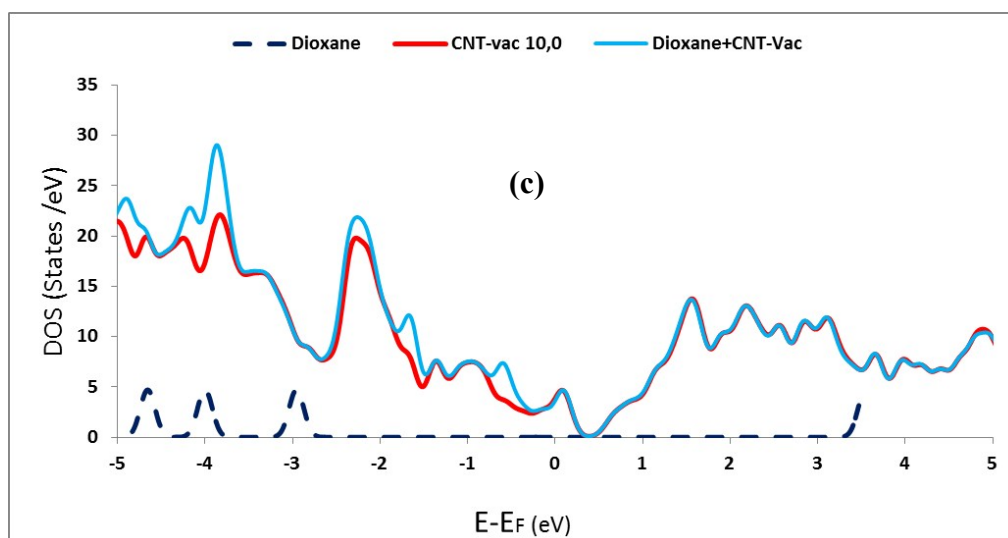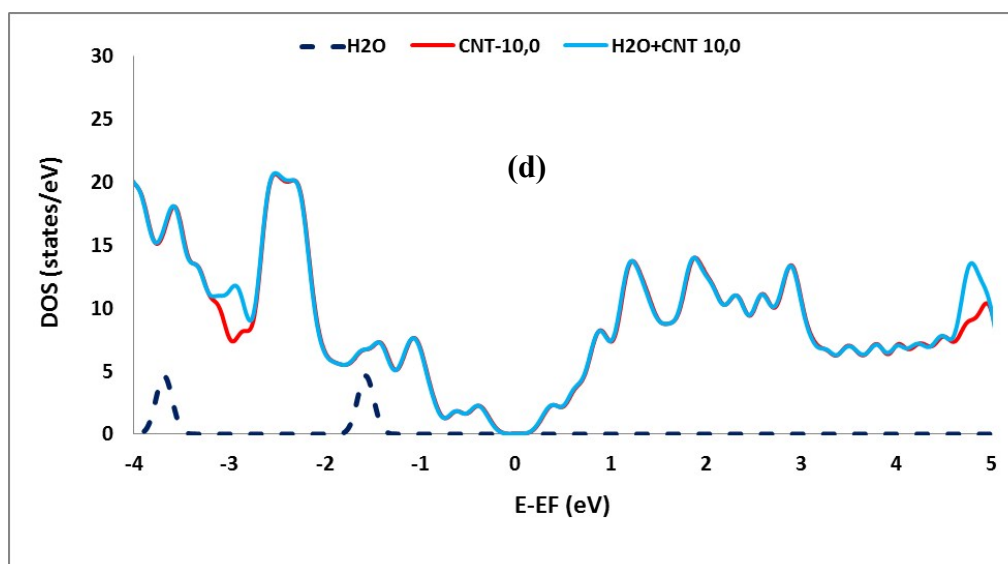

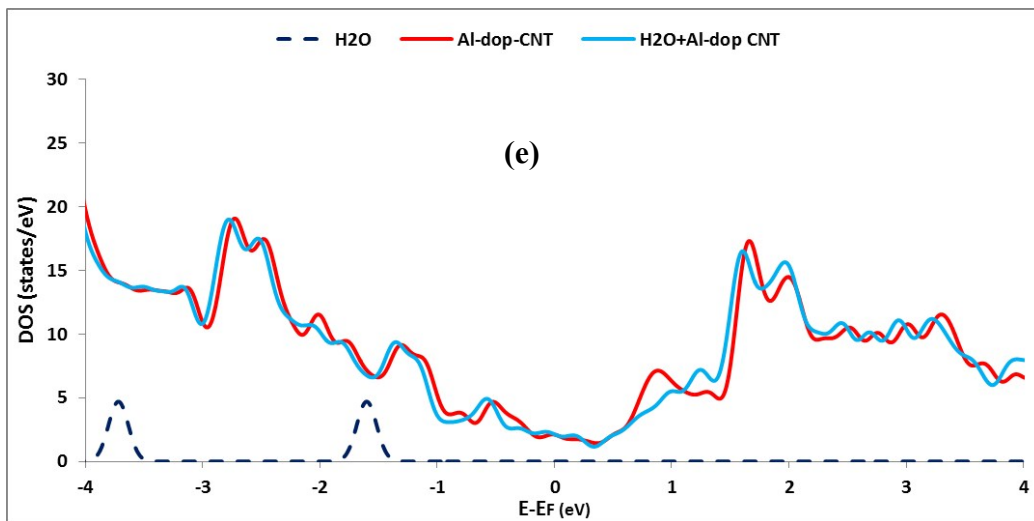

Supplement: c5ra07611k1.pdf [file c5ra07611k1.pdf]
